# Supplementary material for: Crystal Structure of Pyrrolysyl-tRNA Synthetase from a Methanogenic Archaeon ISO4-G1 and its Structure-Based Engineering for Highly-Productive Cell-Free Genetic Code Expansion with Non-Canonical Amino Acids
Source: Preprints.org preprint supplement (doi:10.20944/preprints202302.0445.v1), 2023-02-27
Supplement: Supplementary file 1 [file supplementary]

Fig. S1 Yanagisawa *et al.*

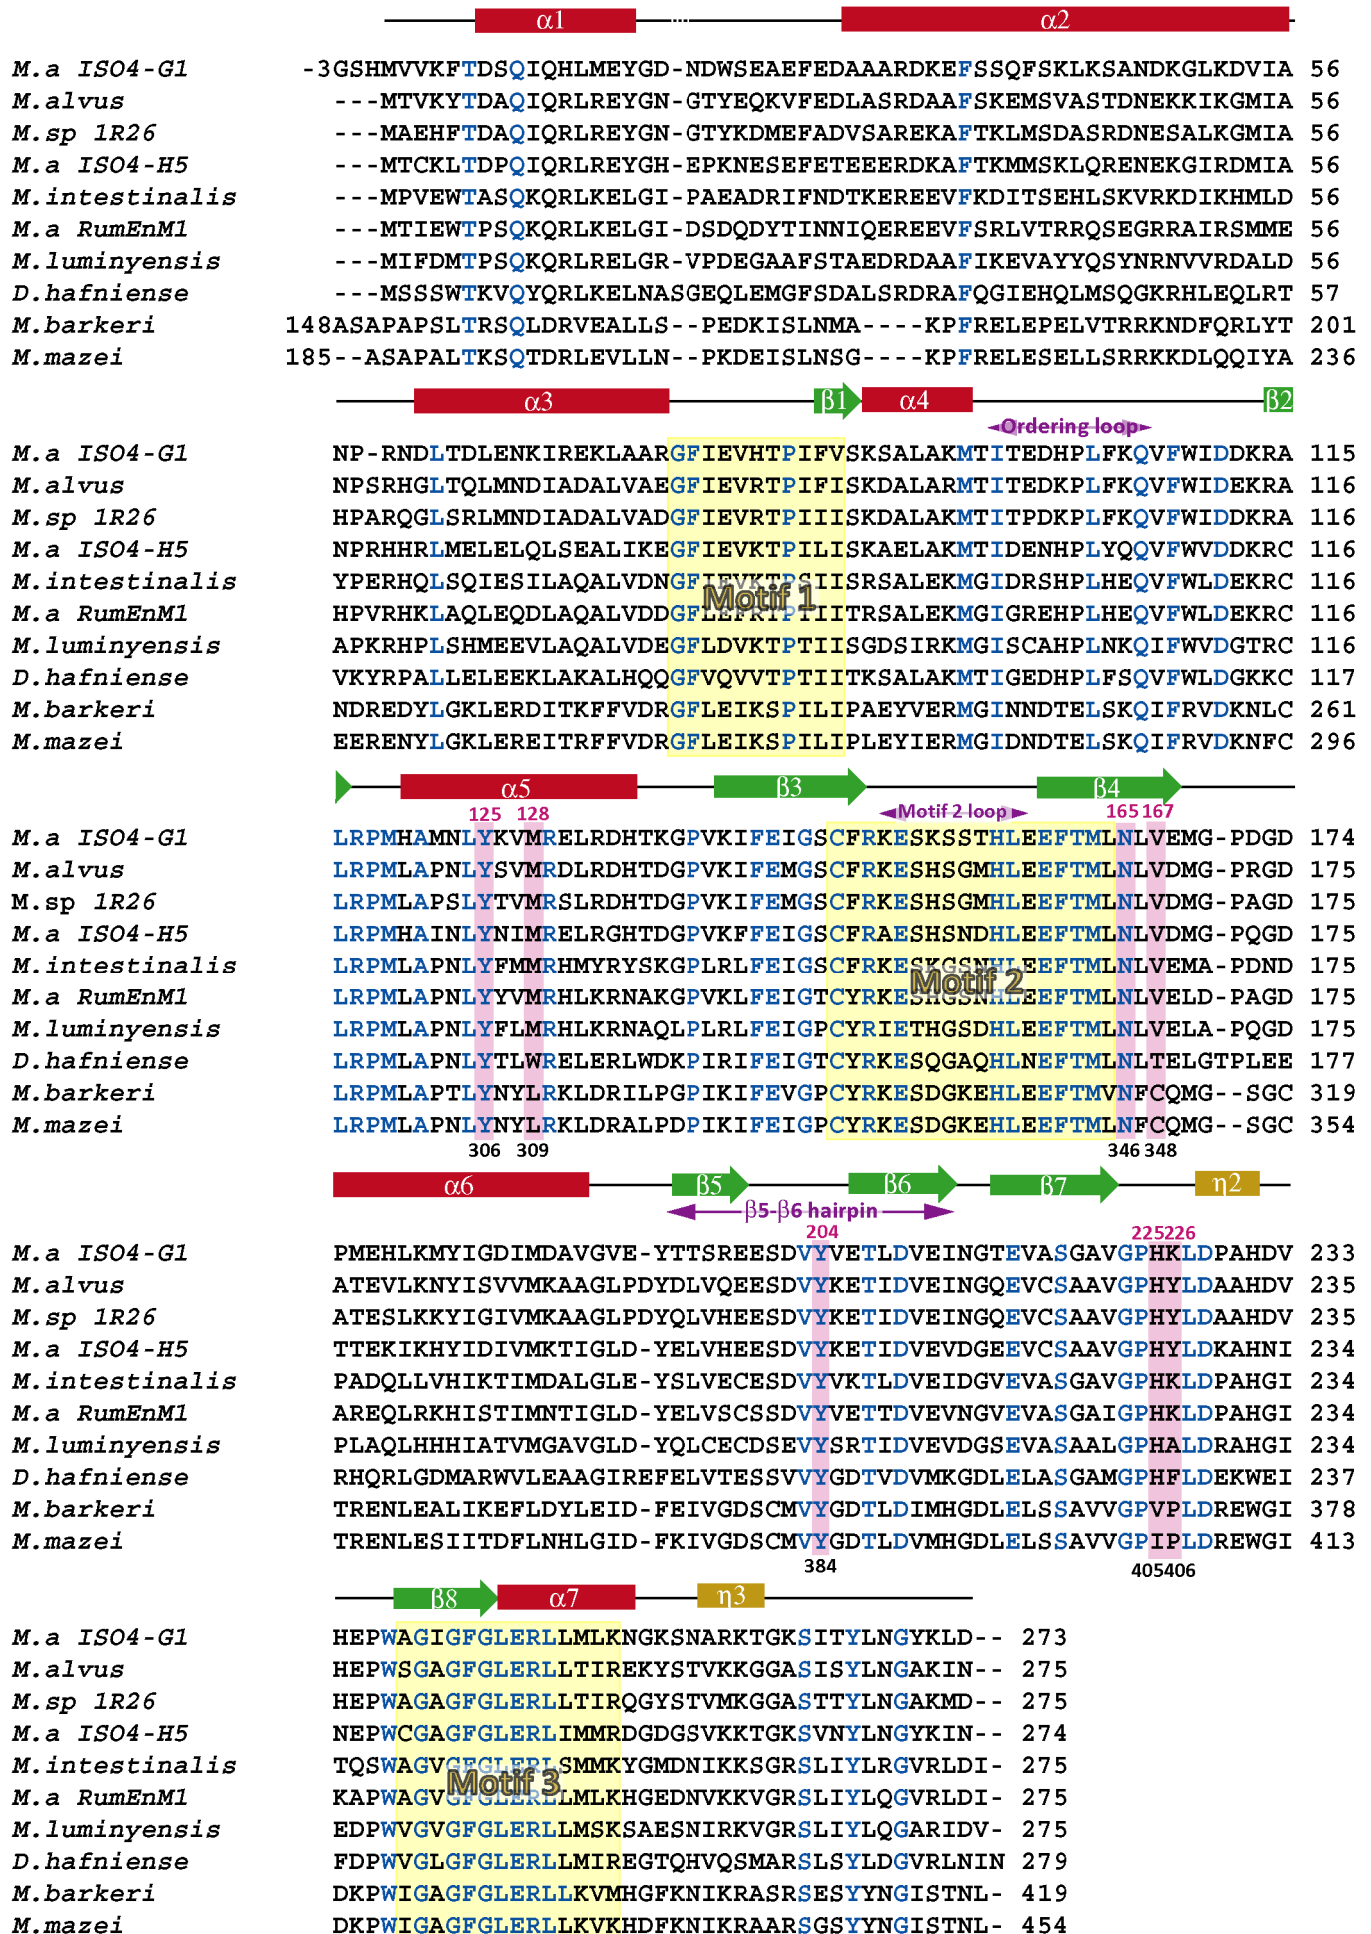

**Fig. S1. Structure-based sequence alignments of ISO4-G1 PylRS and other PylRSs.**

The PylRS sequences were aligned with the program CLUSTAL W [77], and then parts of the alignments were adjusted manually. Highly conserved residues among the PylRSs are shown in blue. The secondary structures ( $\alpha$ -helices,  $3_{10}$  helices, and  $\beta$ -sheets) are shown as wine red bars, olive bars, and green arrows, respectively, above the sequence alignments. Numbers at the top and bottom correspond to the amino acid residues of ISO4-G1 PylRS and *Mm*PylRS, respectively. Dashes represent breaks in the actual amino acid sequences to allow sequence alignments with PylRSs. Motifs 1, 2, and 3 are colored yellow. The ordering loop, the motif-2 loop, and the  $\beta$ 5- $\beta$ 6 hairpin are shown on the top line. Amino acid residues that were mutated in this study are colored pink. Accession numbers are as follows. ISO4-G1 PylRS (*M.a* ISO4-G1, AMK13702); *Ma*PylRS (*M. alvus*, WP\_015505008); 1R26PylRS (*M. sp* 1R26, WP\_058747239); ISO4-H5 PylRS (*M.a* ISO4-H5, WP\_066075773); RumPylRS (*M.a RumEnM1*, KQM11560); *MI*PylRS (*M. luminyensis*, WP\_019176308); *Mt*PylRS (*M. termitum*, WP\_048111907); *Mi*PylRS (*M. intestinalis*, WP\_020448777); *Dh*PylSc (*D. hafniense*, WP\_018307530); *Mb*PylRS (*M. barkeri*, Q6WRH6); and *Mm*PylRS (*M. mazei*, Q8PWY1).

**Fig. S2 Yanagisawa *et al.***

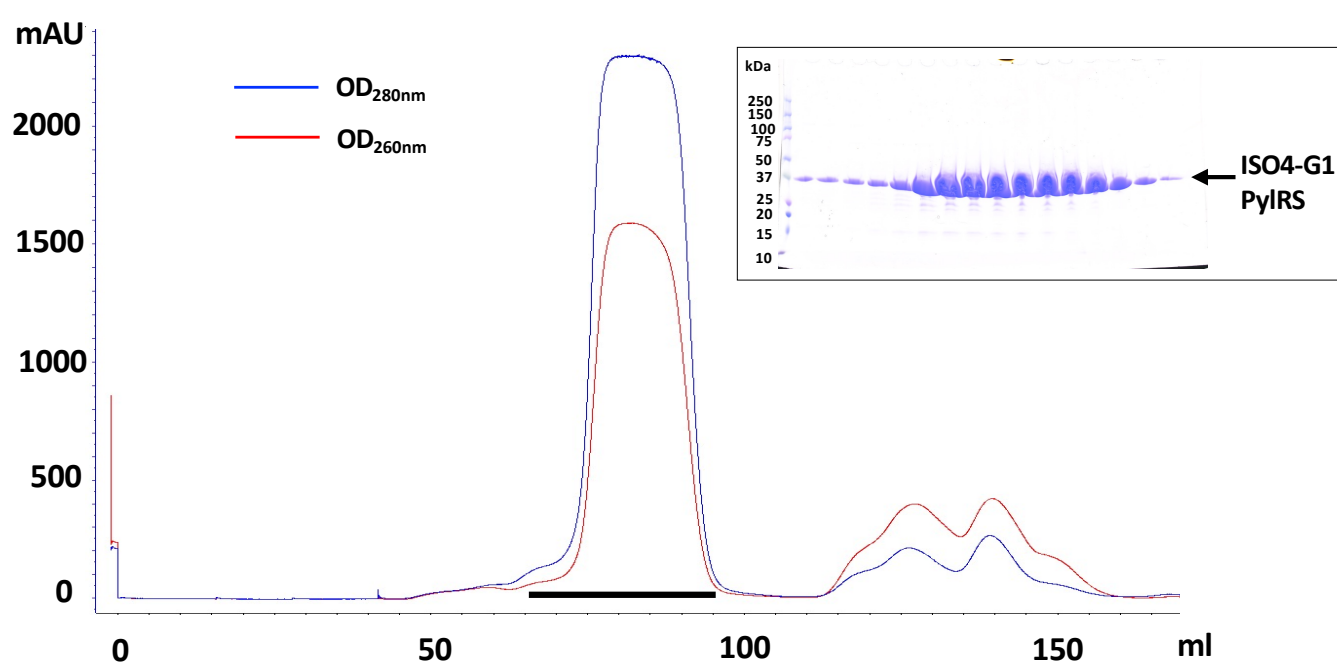

**Fig. S2. Chromatogram for the purification of ISO4-G1 PylRS by Superdex 200 size-exclusion chromatography.** SDS-PAGE analysis of the ISO4-G1 PylRS fractions (inset). The absorbances of the ISO4-G1 PylRS fractions are saturated at 280 nm and 260 nm. The black bar represents the range of fractions subjected to SDS-PAGE analysis.

Fig.S3 Yanagisawa *et al.*

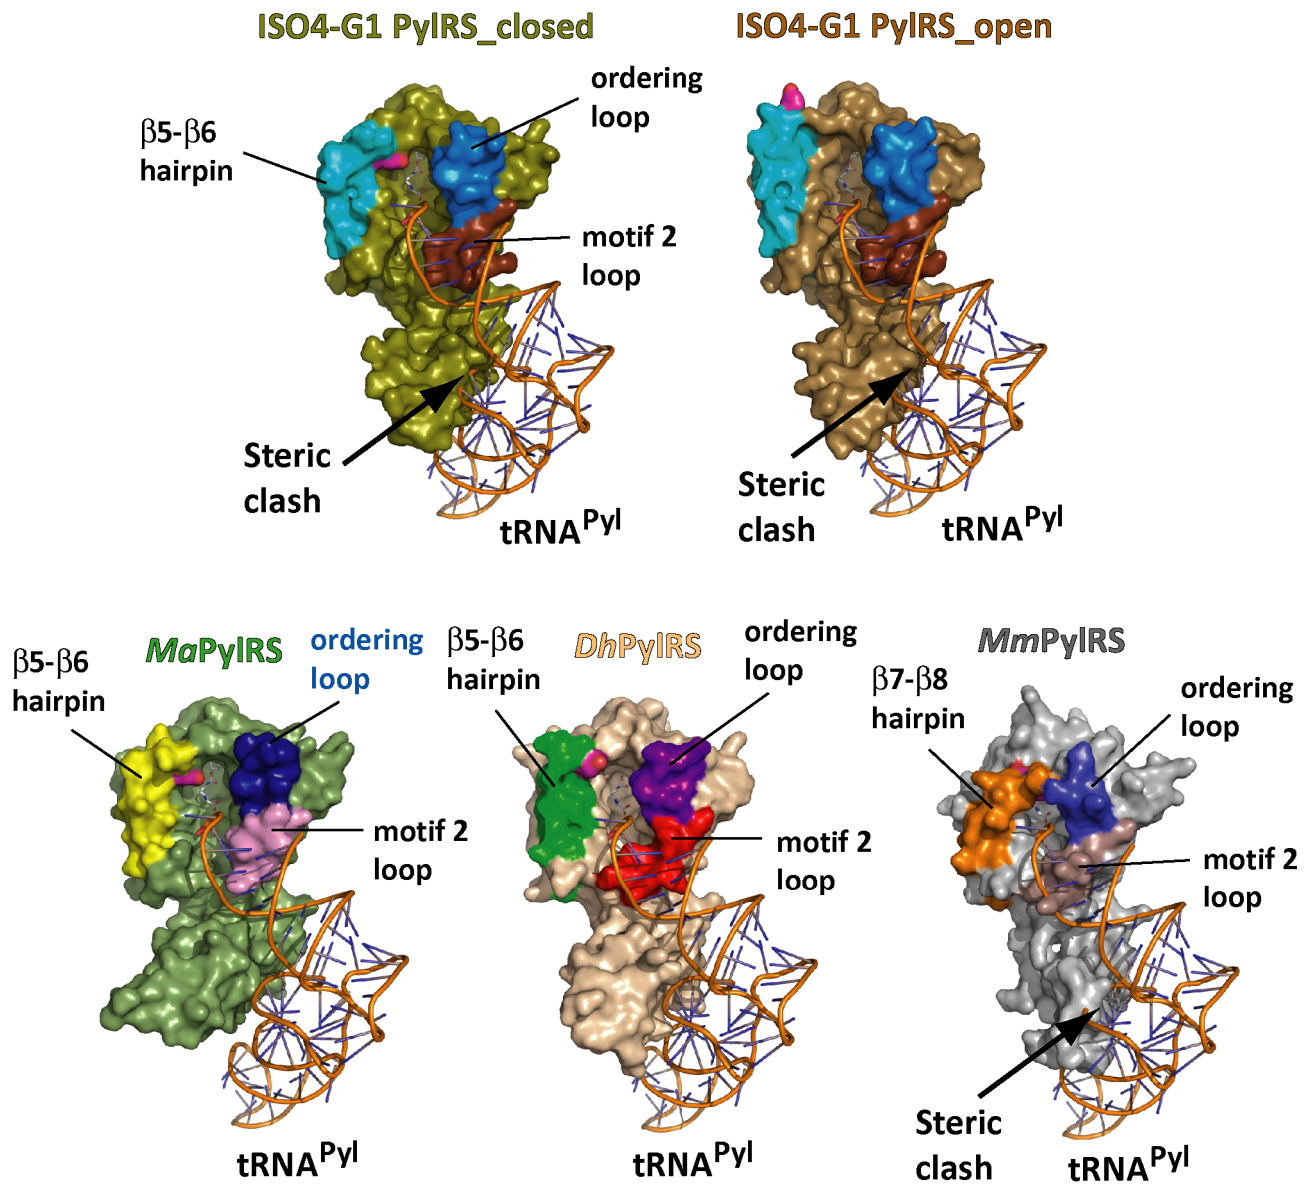

**Fig. S3. Structural comparison of ISO4-G1 PylRS with *Ma*PylRS, *Mm*PylRSc, and *Dh*PylSc•tRNA<sup>Pyl</sup>.**

Superimpositions of the ISO4-G1 PylRS with the *Ma*PylRS, the *Dh*PylSc•tRNA<sup>Pyl</sup> complex (PDB code: 2ZNI), the apo form (PDB: 2E3C), and the Pyl-AMP-bound *Mm*PylRSc (PDB: 2ZIM) structures, represented by surface models. The ordering loop, the motif-2 loop, and the  $\beta$ 5- $\beta$ 6 hairpin ( $\beta$ 7- $\beta$ 8 hairpin in *Mm*PylRS) are colored differently. The catalytic core structures of ISO4-G1 PylRS, *Ma*PylRS, *Dh*PylSc, and *Mm*PylRSc superimposed well, but the two  $\alpha$ -helices ( $\alpha$ 1 and  $\alpha$ 2) of *Mm*PylRSc are slightly tilted and cause steric hindrance with tRNA<sup>Pyl</sup>.



**Fig. S4 Yanagisawa *et al.***

**a**      **Open (molecule A)**

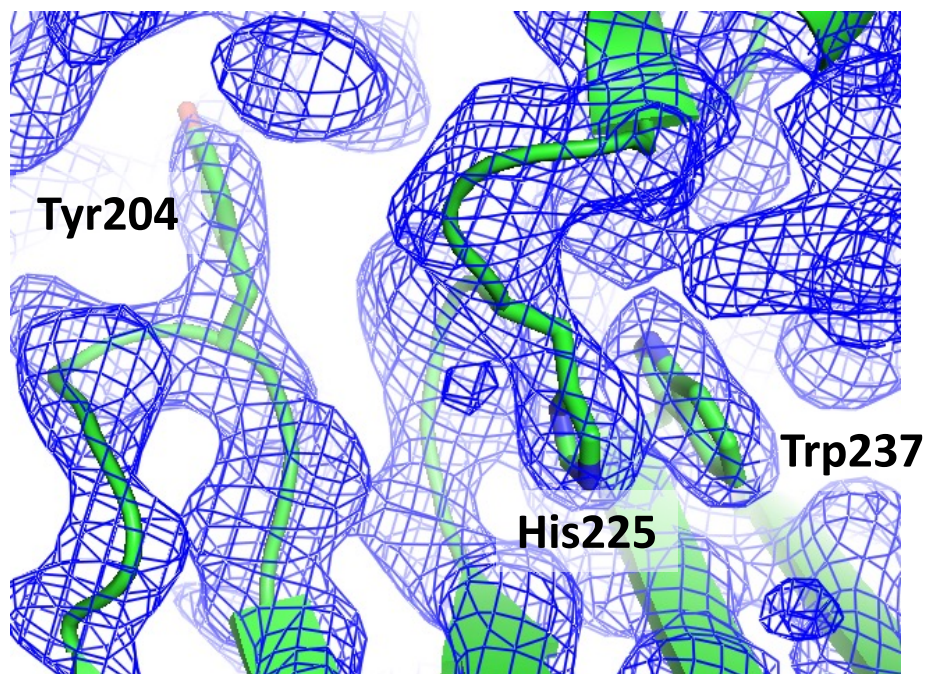

**b**      **Closed (molecule B)**

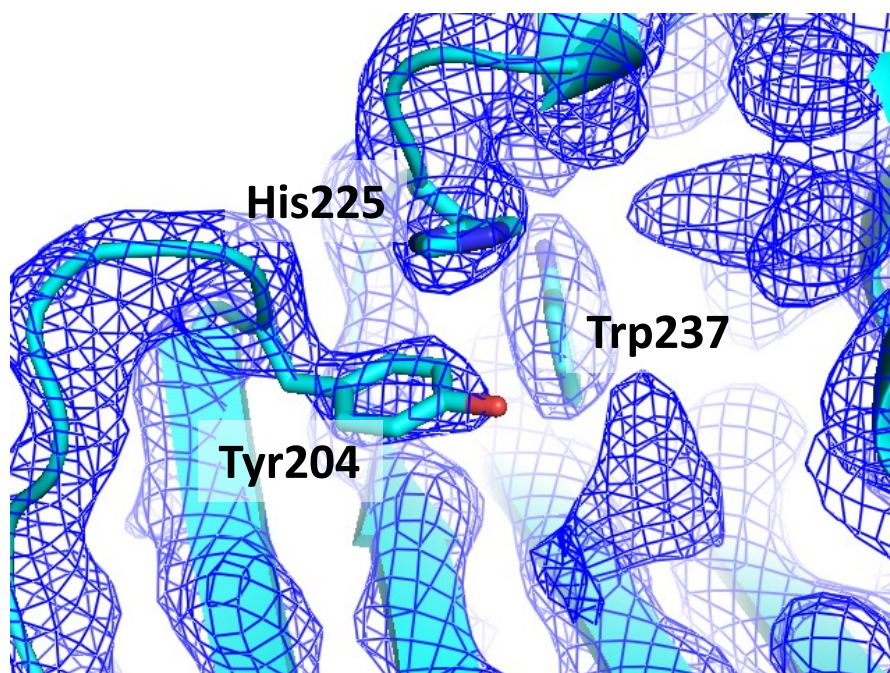

**Fig. S4. Electron density map of the  $\beta 5$ - $\beta 6$  region in the ISO4-G1 PylRS structure.**

The *2Fo-Fc* electron density map for the regions around Tyr204, His225, and Trp237 is represented as a blue mesh at a contour level of  $1\sigma$ . (a) The open conformation. (b) The closed conformation. The Tyr204, His225, and Trp237 residues are shown as stick models.



Fig. S5 Yanagisawa *et al.*

**a**

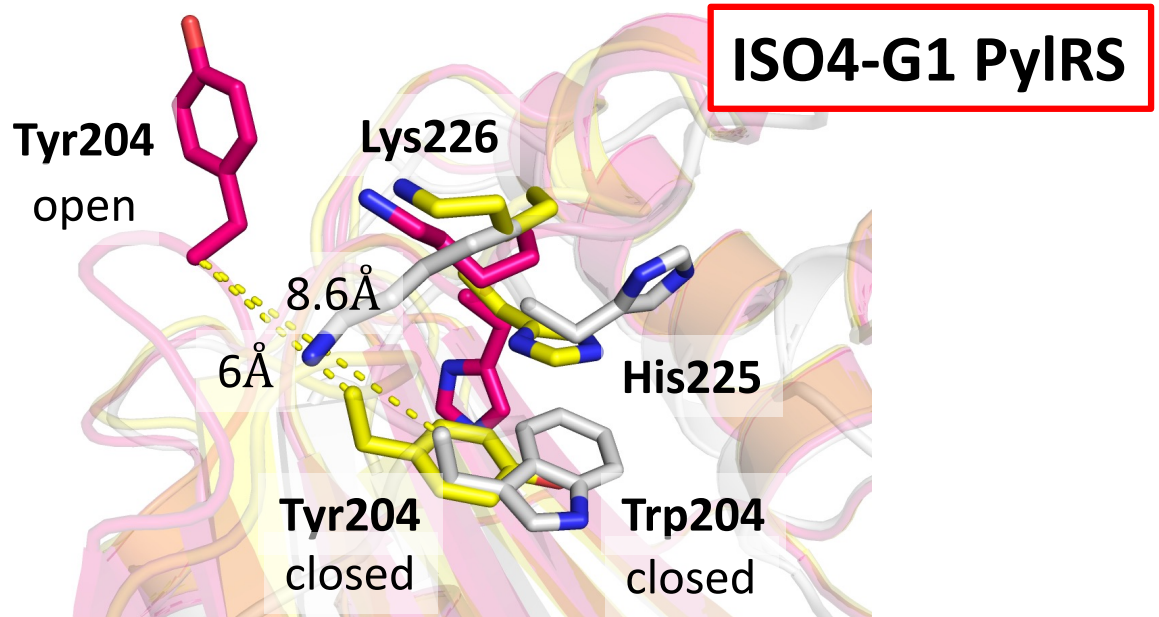

**b**

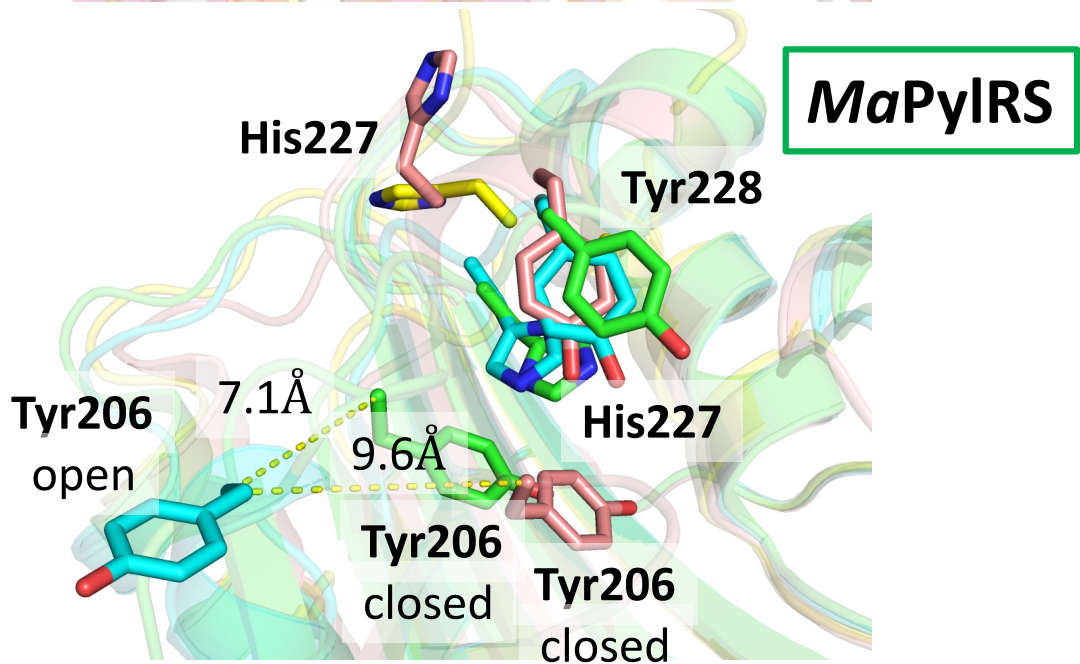

**c**

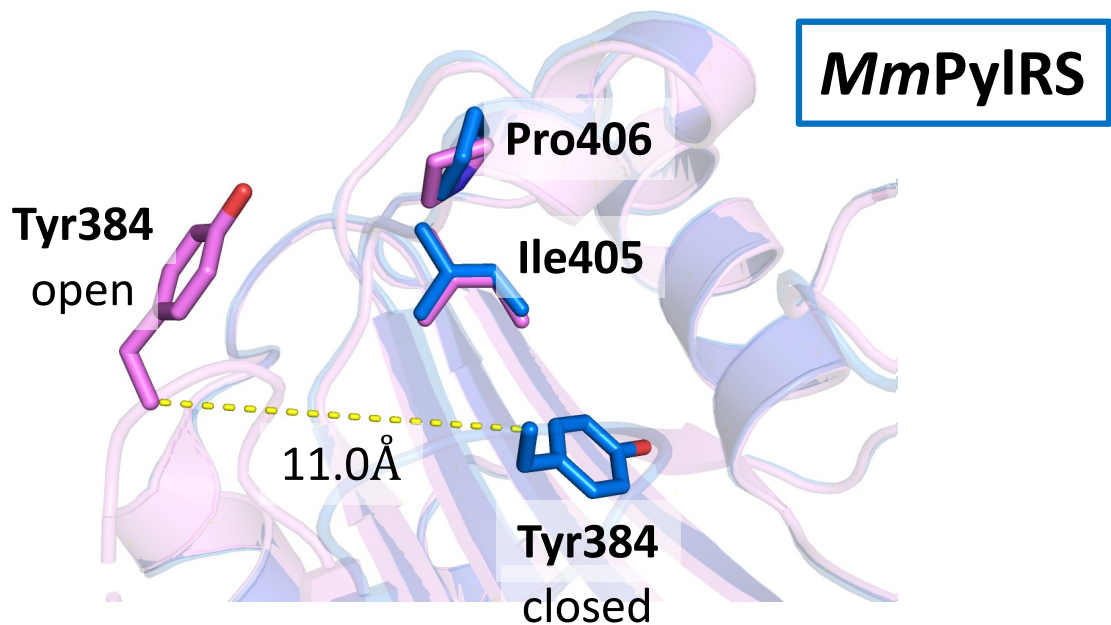

**Fig. S5. Conformational changes of the active-site residues in the open and closed forms of the ISO4-G1 PylRS, *Ma*PylRS, and *Mm*PylRS structures.** (a) The open and closed conformations of the ISO4-G1 PylRS apo form (magenta and yellow, respectively), and the closed conformation of the ISO4-G1 PylRS mutant (7R6O, white). (b) The open and closed conformations of the *Ma*PylRS apo form (6JP2, cyan and light green, respectively), and the closed conformation of the *de novo* screened *Ma*PylRS(N166A/C168G/W239C) mutant bound to acrydonylalanine and AMPPNP (8DQG, vermilion). Tyr206 is disordered in the AMPPNP-bound form (8DQG, yellow). (c) The open conformation of the *Mm*PylRS apo form (pink), and the closed conformation of *Mm*PylRS bound to pyrrolysyladenylate (2Q7H, sky blue). The translucent ribbon models are shown in the background. The ISO4-G1 PylRS Tyr205 residue corresponds to Tyr206 in *Ma*PylRS, and to Tyr384 in *Mm*PylRS. The ISO4-G1 PylRS His225 residue corresponds to His227 in *Ma*PylRS, and to Ile405 in *Mm*PylRS. The ISO4-G1 PylRS Lys226 residue corresponds to Tyr228 in *Ma*PylRS, and to Pro406 in *Mm*PylRS. Each residue is shown as a stick model.

**Fig.S6 Yanagisawa *et al.***

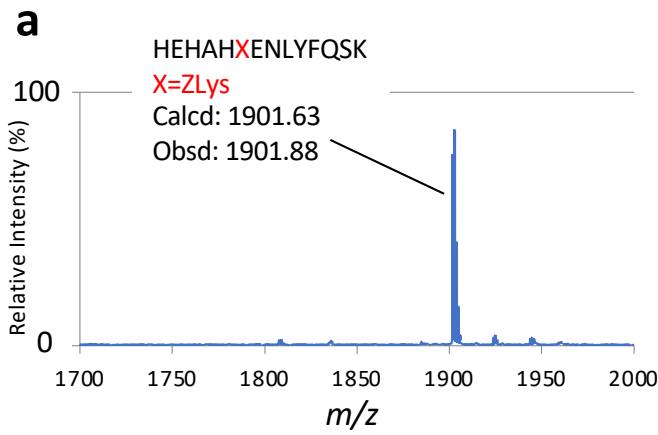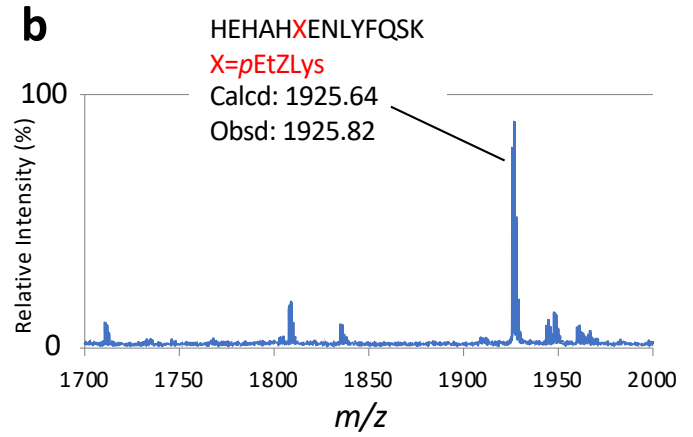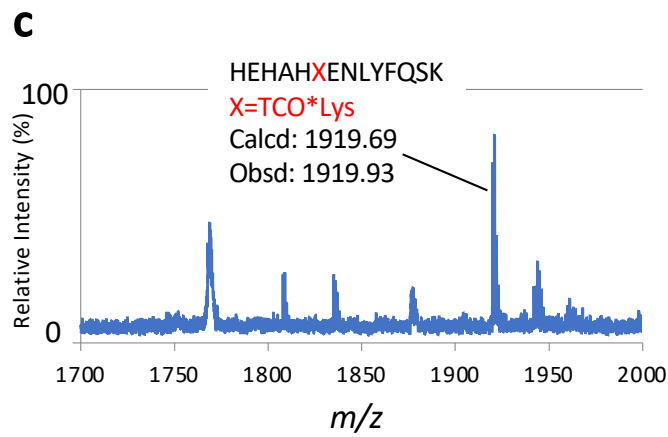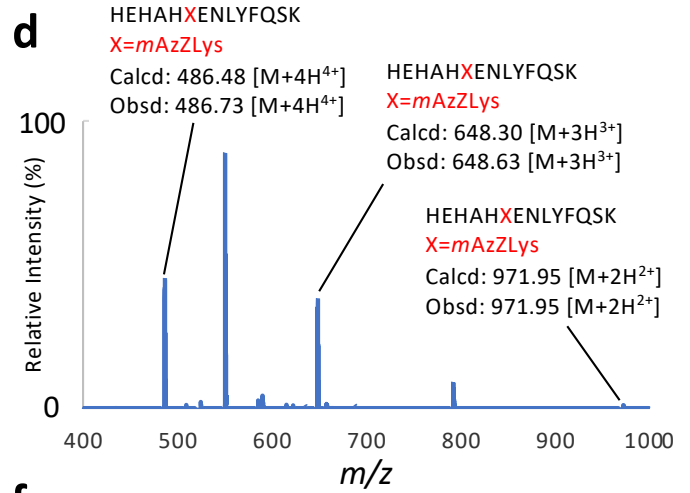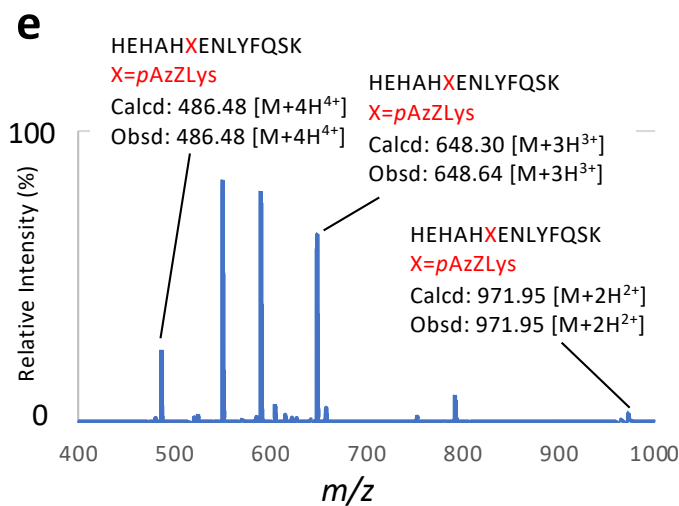

**f**

**N11-17amber**-GFPS1 sequence

MKDHLIHHHKKHEHAH**X**ENLYFQSKGEELFTGVVPIL  
 VELDGDVNGHKFSVSGEGEGDATYGKLTCLKICTTGK  
 LPVPWPTLVTTLTYGVCFSRYPDHMKRHDFFKSAM  
 PEGYVQERTISFKDDGNYKTRAEVKFEGDTLVNRIELK  
 GIDFKEDGNILGHKLEYNYNSHNVYITADKQKNGIKA  
 NFKIRHNIEDGSVQLADHYQQNTPIGDGPVLLPDNH  
 YLSTQSALS KDPNEKRDMVLLFVTAAGITHGMDE  
 LYK

**Fig. S6. Mass spectrometry analysis of N11-GFPS1 proteins containing non-canonical amino acids.** The amino acid sequence of GFPS1, with a 24-residue N11-peptide tag at the N-terminus, is shown in (f). The codon of the N11-GFPS1 residue Ala17, which is highlighted by a red X, is mutated to an amber (UAG) codon. The incorporations of ZLys (a), *p*EtZLys (b), and TCO\*Lys (c), at position 17 in N11-GFPS1, were confirmed by MALDI-TOF analyses. The incorporations of *m*AzZLys (d) and *p*AzZLys (e), at position 17 in N11-GFPS1, were confirmed by ESI-MS analyses of the tryptic peptide HEHAHXENLYFQSK (X represents a non-canonical amino acid). The observed molecular masses agreed well with the calculated masses.

**Table S1**

Data collection and refinement statistics.

|                                                         |                     |
|---------------------------------------------------------|---------------------|
|                                                         | ISO4-G1 PylRS       |
| PDB code                                                | 8IFJ                |
| X-ray source                                            | SPring-8<br>BL32XU  |
| No. of crystals                                         | 1                   |
| Wavelength                                              | 1.0000              |
| Space group                                             | $P2_12_12_1$        |
| Cell dimensions                                         |                     |
| $a$ (Å)                                                 | 98.51               |
| $b$ (Å)                                                 | 102.68              |
| $c$ (Å)                                                 | 349.86              |
| $\alpha, \beta, \gamma$ (°)                             | 90, 90, 90          |
| Resolution (Å)                                          | 50–2.78 (2.85–2.78) |
| $I/\sigma$ (I)                                          | 14.47 (1.32)        |
| Completeness (%)                                        | 99.73 (99.77)       |
| No. reflections                                         | 90,164              |
| Redundancy (%)                                          | 5.99 (6.07)         |
| <sup>a</sup> $R_{\text{meas}}$                          | 0.16 (1.94)         |
| Refinement                                              |                     |
| <sup>b</sup> $R_{\text{work}} / ^c R_{\text{free}}$ (%) | 23.3/29.5           |
| Resolution (Å)                                          | 49.9–2.78           |
| No. atoms                                               |                     |
| protein                                                 | 21,566              |
| water                                                   | 49                  |
| No. reflections<br>(total / test)                       | 90,021/1,999        |
| Average B-factors                                       |                     |
| protein                                                 | 100.10              |
| water                                                   | 57.18               |
| R.m.s. deviations                                       |                     |
| Bond length (Å)                                         | 0.004               |
| Bond angles (°)                                         | 0.640               |
| Ramachandran plot                                       |                     |
| Most favored (%)                                        | 96.09               |
| Allowed (%)                                             | 3.91                |
| Disallowed (%)                                          | 0.00                |

The numbers in parentheses are for the last shell.

<sup>a</sup>  $R_{\text{meas}} = S_{hkl} (n^{1/2} / (n-1)^{1/2}) S_i |I_{\text{avg}} - I_i| / S_{hkl} S I_i$ .

<sup>b</sup>  $R_{\text{work}} = S_{hkl} |F_o - F_c| / S_{hkl} F_o$  for reflections of work set.

<sup>c</sup>  $R_{\text{free}} = S_{hkl} |F_o - F_c| / S_{hkl} F_o$  for reflections of test set [2.2% of total reflections for ISO4-G1 PylRS].
